# Supplementary material
Source: publisher figshare collection journal article supplement (https://acs.figshare.com/ndownloader/files/3830092)
Supplement: Supplementary file 1 [file 3830092]

## **Supporting Information**

### **Influence of Composition Fluctuations on the Linear Viscoelastic Properties of Symmetric Diblock Copolymers near the Order-Disorder Transition**

Robert J. Hickey,<sup>1</sup> Timothy M. Gillard,<sup>2</sup> Timothy P. Lodge,<sup>1,2</sup> and Frank S. Bates<sup>2</sup>

<sup>1</sup>Department of Chemistry and <sup>2</sup>Department of Chemical Engineering and Materials Science,  
University of Minnesota, Minneapolis, MN 55455

*Rheological Experiments* – A Rheometrics Scientific ARES strain-controlled rheometer with the 25 mm diameter parallel plate geometry and a forced convection oven with a nitrogen atmosphere was used for the measurements. PCHE-PE samples ( $M_n = 13.6$  kg/mol and 18.9 kg/mol) were loaded to give a gap of approximately 1 mm, heated above any thermal transitions (e.g., glass transitions or order-disorder transitions), cooled at 1 °C/min to specific temperatures (see Tables S1 and S2) and held for 1 hr before running frequency sweeps. Frequency sweeps were run in the frequency range of  $0.01 \leq \omega \leq 100$  rad/s. Strains were chosen to maximize torque while remaining in the linear viscoelastic regime.

*Small Angle X-ray Scattering (SAXS)* – Synchrotron SAXS experiments were conducted at the DND-CAT 5-ID-D beamline at the Advanced Photon Source located in Argonne National Laboratory (Argonne, IL USA) using the triple-detector small-, middle-, and wide-angle X-ray scattering (SAXS/MAXS/WAXS) instrument. An X-ray wavelength of 0.756 Å was used with SAXS and MAXS sample-to-detector distances of approximately 8.5 m and 1 m, respectively. SAXS data were collected with a Rayonix area CCD detectors. All scattering patterns were nearly azimuthally isotropic and were azimuthally integrated to obtain 1D plots of intensity (in arbitrary units) versus scattering wave vector  $q = 4\pi\lambda^{-1}\sin(\theta/2)$ . The PCHE-PE-14 sample was loaded in a 1.5 mm nominal diameter quartz capillary (Charles Supper Company) and the temperature was controlled during SAXS experiments with a modified Linkam HFS91 hot stage. Prior to the SAXS experiments, the sample was heated above  $T_{ODT}$  to equilibrate the sample in the disorder phase in order to remove any processing history, slowly cooled (ca. 1 °C/min) to 140 °C, annealed at 140 °C under vacuum for 15 hrs, and then quenched to room temperature to freeze the equilibrium structure. At the beamline, the sample was quickly reheated to 140 °C to record the equilibrium structure at this temperature. The sample was then heated to 300 °C stopping at several temperatures to collect scattering patterns of the equilibrium structure. The sample was equilibrated at each temperature for approximately 1 min prior to data collection while changes in temperature between measurements were fast ( $> 20$  °C/min).

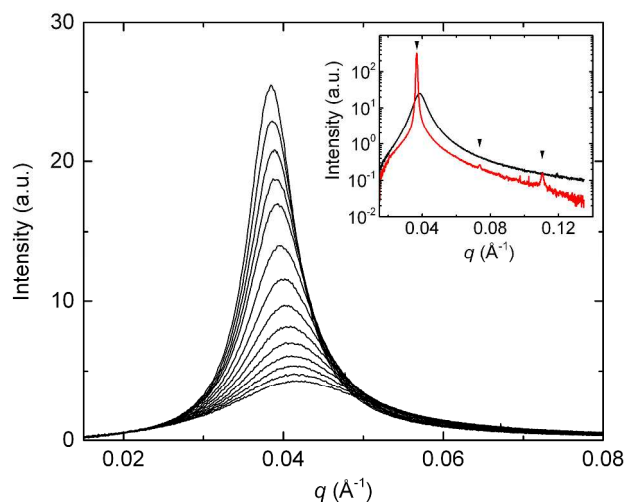

**Figure S1.** SAXS spectra of the disordered state for PCHE-PE-14 upon heating (190 – 300 °C). The inset plot shows background-subtracted SAXS spectra for an ordered lamellar morphology (red, 140 °C) and a disordered state (black, 190 °C).

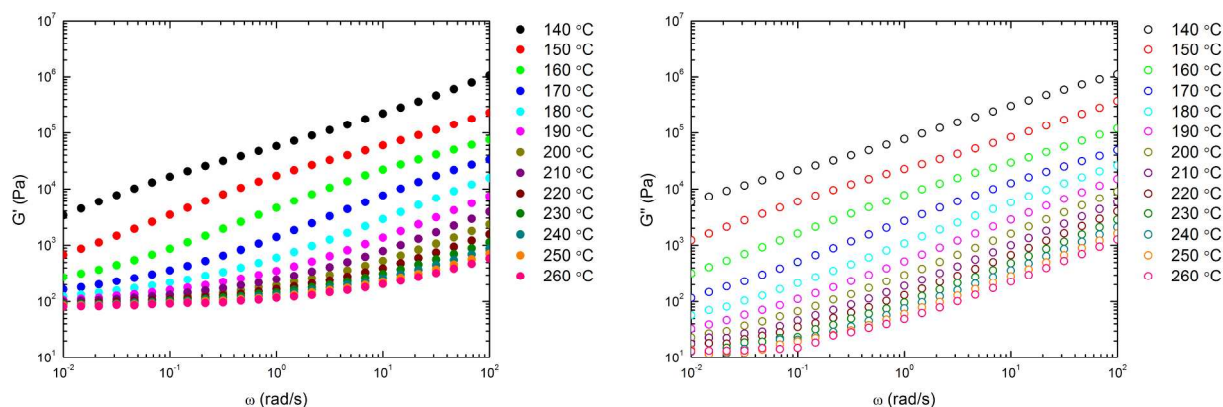

**Figure S2.** Plots of the dynamic storage ( $G'$ ) and loss ( $G''$ ) moduli for PCHE-PE-19 (18.9 kg/mol) as a function of  $\omega$ . Data were obtained from dynamic frequency sweeps at various temperatures and strain % values listed in Table S1. The order-disorder transition for PCHE-PE-19 is  $317 \pm 1$  °C.

**Table S1.** The strain (%) and shift factors ( $a_T$ ) used for the time-temperature superposition of PCHE-PE-19.

| Temperature<br>(°C) | Strain (%) | $a_T$ |
|---------------------|------------|-------|
| 140                 | 0.7        | 900   |
| 150                 | 0.7        | 110   |
| 160                 | 1.0        | 17    |
| 170                 | 1.0        | 3.5   |
| 180                 | 1.0        | 1     |
| 190                 | 1.0        | 0.35  |
| 200                 | 1.0        | 0.14  |
| 210                 | 1.0        | 0.065 |
| 220                 | 1.0        | 0.04  |
| 230                 | 1.0        | 0.025 |
| 240                 | 1.0        | 0.015 |
| 250                 | 1.0        | 0.01  |
| 260                 | 1.0        | 0.009 |

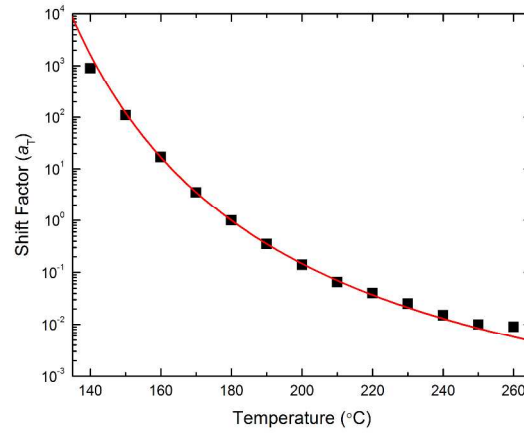

**Figure S3.** Shift factors ( $a_T$ ) for PCHE-PE-19 as a function of temperature.

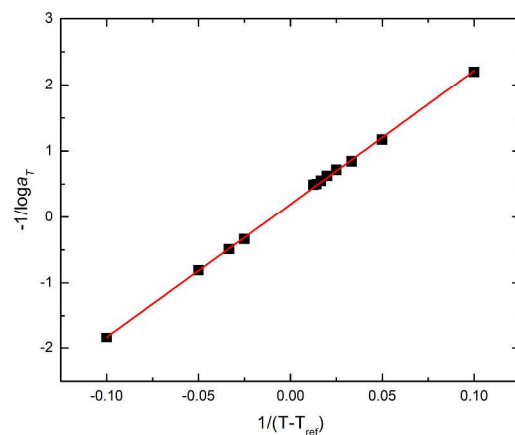

**Figure S4.** Linear WLF fit for PCHE-PE-19. The reference temperature is 180 °C. The WLF parameters were calculated to be  $c_1 = 5.16$  and  $c_2 = 104.25$  °C, with a reference temperature of 180 °C.

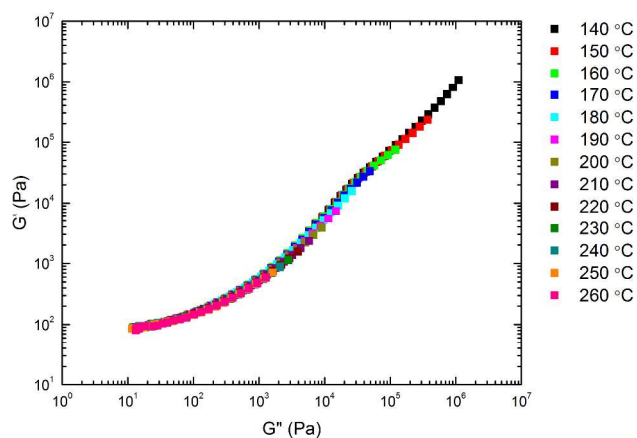

**Figure S5.** Cole-Cole plot of PCHE-PE-19 (18.9 kg/mol).

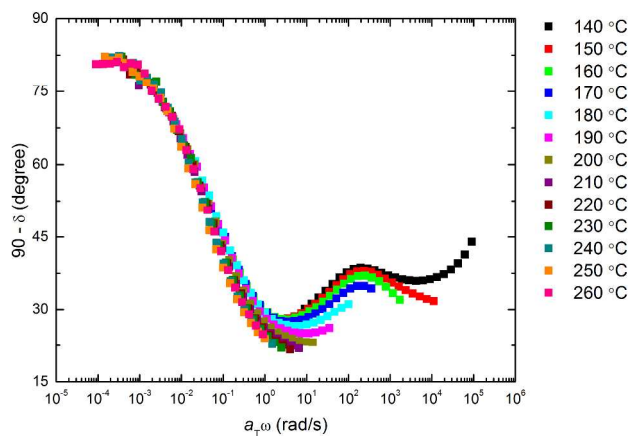

**Figure S6.** Phase angle versus shifted frequency for PCHE-PE-19. Shift factors ( $a_T$ ) were applied to the frequency with a reference temperature of 180 °C and  $c_1 = 5.16$  and  $c_2 = 104.25$  °C.

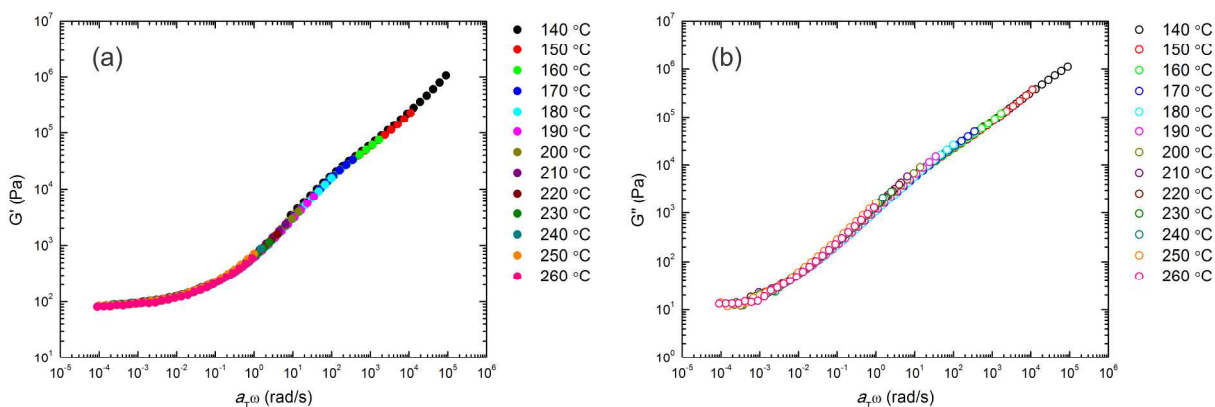

**Figure S7.** The tTS master curve for the (a) dynamic storage ( $G'$ ) and (b) loss ( $G''$ ) moduli for PCHE-PE-19. Shift factors ( $a_T$ ) were applied to the frequency with a reference temperature of 180 °C and  $c_1 = 5.16$  and  $c_2 = 104.25$  °C

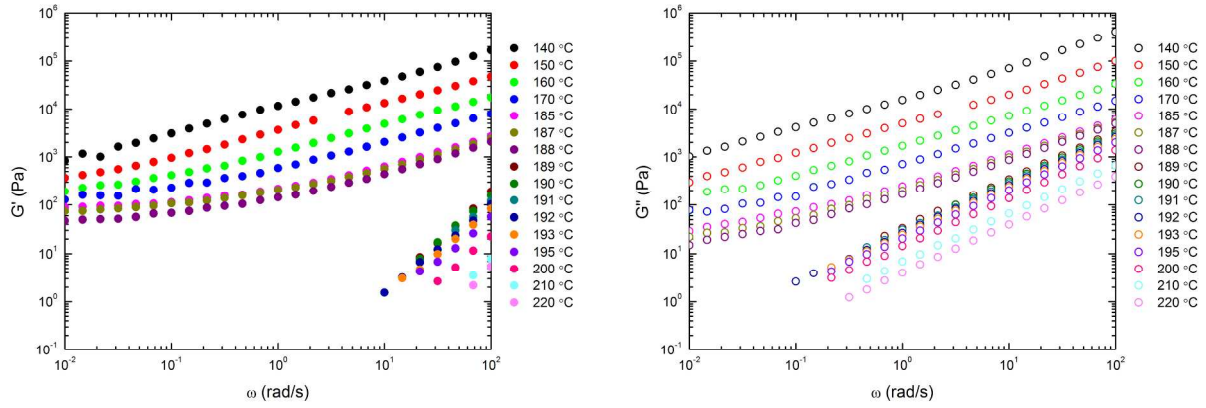

**Figure S8.** Plots of the dynamic storage ( $G'$ ) and loss ( $G''$ ) moduli as a function of  $\omega$  for PCHE-PE-14 near the order-disorder transition ( $189 \pm 1$  °C). The data was obtained from dynamic frequency sweeps at the various isothermal temperatures and strain % listed in Table S2.

**Table S2.** Strain (%) and shift factors ( $a_T$ ) used for the time-temperature superposition of PCHE-PE-14. The applied  $a_T$  values used were calculated from the WLF equation, as determined from PCHE-PE-19, with a reference temperature of 180 °C and  $c_1 = 5.16$  and  $c_2 = 104.25$  °C.

| Temperature (°C) | Strain (%) | $a_T$ |
|------------------|------------|-------|
| 140              | 0.05       | 900   |
| 150              | 0.05       | 110   |
| 160              | 0.05       | 17    |
| 170              | 0.05       | 3.5   |
| 180              | 0.1        | 1     |
| 185              | 0.5        | 0.58  |
| 187              | 0.5        | 0.47  |
| 188              | 0.5        | 0.43  |
| 189              | 0.5        | 0.39  |
| 190              | 1.0        | 0.35  |
| 191              | 1.0        | 0.32  |
| 192              | 3.0        | 0.29  |
| 193              | 3.0        | 0.27  |
| 195              | 3.0        | 0.22  |
| 200              | 3.0        | 0.14  |
| 210              | 5.0        | 0.065 |
| 220              | 15         | 0.04  |

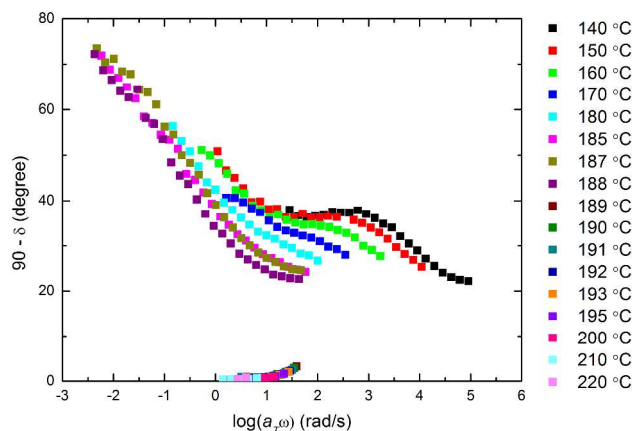

**Figure S9.** Phase angle versus shifted frequency for PCHE-PE-14. Shift factors ( $a_T$ ) were applied to the frequency with a reference temperature of 180 °C and  $c_1 = 5.16$  and  $c_2 = 104.25$  °C.

### Example Longest Relaxation Time Calculation

#### *PCHE-PE-14:*

In the work presented here, a PCHE homopolymer with  $M_n = 7.6$  kg/mol was estimated to have a single-chain relaxation time of 0.03 s at 190 °C. This value was determined from the crossover frequency where  $G'(\omega) = G''(\omega)$  in DMS spectra from a previously published report of the viscoelastic properties of PCHE homopolymers.<sup>1</sup> Specifically, the crossover frequency for a  $M_n = 13.4$  kg/mol PCHE homopolymer was  $a_T\omega \approx 20$  rad/s, which was determined from a master curve described by WLF parameters with values,  $c_1 = 8.51$  and  $c_2 = 104.3$  °C at a  $T_{\text{ref}} = 187$  °C. To calculate the relevant PCHE relaxation time (i.e. for  $M_n = 7.6$  kg/mol,  $T = 190$  °C), it was necessary to make corrections for differences in  $T$  and  $M_n$  using reported WLF parameters and the Rouse ( $\tau_1 \sim M_n^2$ ) scaling relationship, respectively. The Rouse ( $\tau_1 \sim M_n^2$ ) scaling relationship was used because both PCHE homopolymers are unentangled. The value of  $a_T$  at 190 °C is 0.58, Therefore, the corrected single-chain relaxation time for a PCHE homopolymer with a molecular weight of 13.4 kg/mol and 7.6 kg/mol at 190 °C is 0.03 s and 0.009 s, respectively.

A similar method was used for PE. The experimental single-chain relaxation time for a PE homopolymer with  $M_n = 109$  kg/mol was 0.0071 s at 190 °C.<sup>2</sup> The reptation ( $\tau_{\text{rep}} \sim M_n^{3.4}$ ) scaling relationship was used because both PE homopolymers are entangled.

**Table S3.** Entanglement molecular weight ( $M_e$ ), glass transition temperature ( $T_g$ ), and calculated homopolymer single-chain relaxation times ( $\tau$ ).

| Diblock Copolymer               | Chain $M_w$ (kg/mol) <sup>a</sup>                            | $M_e$ (kg/mol) <sup>b</sup>            | $T_g$ (°C) <sup>c</sup>                | $\tau$                                           | Rheological Fingerprint <sup>e</sup> |
|---------------------------------|--------------------------------------------------------------|----------------------------------------|----------------------------------------|--------------------------------------------------|--------------------------------------|
| PCHE-PE<br>$T = 190$ °C         | PCHE (7.6) <sup>1</sup><br>PE (6.0) <sup>2</sup>             | 39.0 <sup>1</sup><br>0.8 <sup>3</sup>  | 140 <sup>1</sup><br>−120 <sup>4</sup>  | 9.3 x 10 <sup>−3</sup><br>3.7 x 10 <sup>−7</sup> | No                                   |
| PtBS-PMMA<br>$T = 180$ °C       | PtBS (8.4)<br>PMMA (9.3)                                     | 37.6 <sup>5</sup><br>10.0 <sup>3</sup> | 141 <sup>6</sup><br>110 <sup>6</sup>   | n/a <sup>d</sup>                                 | Yes <sup>7</sup>                     |
| PS-PI<br>$T = 180$ °C           | PS (10.7) <sup>8</sup><br>PI (10.3) <sup>10</sup>            | 13.3 <sup>3</sup><br>5.4 <sup>3</sup>  | 100 <sup>4</sup><br>−60 <sup>11</sup>  | 6.7 x 10 <sup>−2</sup><br>1.8 x 10 <sup>−6</sup> | No <sup>9</sup>                      |
| 1,2-PBD-1,4-PBD<br>$T = 100$ °C | 1,2 PBD (50.4) <sup>12</sup><br>1,4 PBD (30.9) <sup>15</sup> | 3.1 <sup>3</sup><br>1.8 <sup>3</sup>   | 3 <sup>13</sup><br>−89 <sup>13</sup>   | 2.0 x 10 <sup>−3</sup><br>7.6 x 10 <sup>−4</sup> | Yes <sup>14</sup>                    |
| PEP-PEE<br>$T = 96$ °C          | PEP (28.0) <sup>16</sup><br>PEE (22.0) <sup>16</sup>         | 2.3 <sup>3</sup><br>11.0 <sup>3</sup>  | −56 <sup>11</sup><br>−20 <sup>11</sup> | 3.6 x 10 <sup>−4</sup><br>8.4 x 10 <sup>−5</sup> | Yes <sup>16</sup>                    |

(a) References indicate where longest relaxation times were determined for the respective homopolymers. (b) References indicate publications where  $M_e$  was reported. (c) References indicate publications where  $T_g$  was reported. (d) Reported homopolymer relaxation spectra for PtBS and PMMA were for highly entangled systems, therefore, single-chain relaxation times were not estimated for the unentangled blocks of the PtBS-PMMA-236 system. Instead, the ratio  $\tau$  was assumed to be approximately 1 since both blocks are unentangled and exhibit an identical  $T_g$ . (e) References indicate publications where diblock copolymer rheology exhibited the rheological fingerprint.

#### **Example $\Delta T_g$ Correction of Longest Relaxation Time for 1,2-PBD-1,4-PBD**

The  $T_g$ s for the constituent blocks of 1,2-PBD-1,4-PBD were estimated from differential scanning calorimetry (DSC) measurements reported in Figure 5 in Bates *et al.*<sup>13</sup> The  $T_{ODT}$  of the material of interest for which the rheological fingerprint of fluctuations is reported (BB6) is well above the measured constituent block  $T_g$ s. Since the block  $T_g$ s are known to depend on the state of segregation in a block polymer, we used the DSC trace of a different sample (BB2) to estimate the  $T_g$ s of the constituent blocks under thermodynamic conditions which most closely approximate those where the rheological fingerprint of fluctuations was measured in BB6 (i.e. in the fluctuating disordered phase near  $T_{ODT}$ ). Sample BB2 was chosen since it is in the fluctuating



disordered phase when the material vitrifies.<sup>14</sup>  $T_g$ s of the 1,2-PBD and 1,4-PBD blocks were estimated to be -30 and -75 °C, respectively.

To incorporate the estimated block  $T_g$ s into our calculation of the block relaxation times outlined above, we took advantage of the fact that WLF parameters are nearly universal when  $T_{\text{ref}} = T_g$ . We converted reported 1,2-PBD and 1,4-PBD WLF parameters to have  $T_{\text{ref}} = T_g$  of the homopolymers (3 and -89 °C, respectively). These WLF parameters were then used to calculate shift factors using the estimated  $T_g$ s of the 1,2-PBD and 1,4-PBD blocks in BB6 (-30 and -75 °C, respectively) as  $T_{\text{ref}}$ . This procedure results in longest relaxation times of  $3.8 \times 10^{-4}$  s and  $1.1 \times 10^{-4}$  s for the 1,2-PBD and 1,4-PBD blocks, respectively, and  $\tau_r = 3$ .

## REFERENCES

1. Zhao, J.; Hahn, S. F.; Hucul, D. A.; Meunier, D. M. *Macromolecules* **2001**, *34*, 1737-1741.
2. Vega, J. F.; Aguilar, M.; Martínez-Salazar, J. J. *Rheol.* **2003**, *47*, 1505-1521.
3. Fetters, L. J.; Lohse, D. J.; Richter, D.; Witten, T. A.; Zirkel, A. *Macromolecules* **1994**, *27*, 4639-4647.
4. Hiemenz, P. C.; Lodge, T. P., *Polymer Chemistry*. 2nd ed.; CRC Press: Boca Raton, FL, 2007.
5. Watanabe, H.; Chen, Q.; Kawasaki, Y.; Matsumiya, Y.; Inoue, T.; Urakawa, O. *Macromolecules* **2011**, *44*, 1570-1584.
6. Kenemur, J. G.; Hillmyer, M. A.; Bates, F. S. *Macromolecules* **2012**, *45*, 7228-7236.
7. Kenemur, J. G.; Hillmyer, M. A.; Bates, F. S. *ACS Macro Lett.* **2013**, *2*, 496-500.
8. Baumgaertel, M.; Schausberger, A.; Winter, H. H. *Rheol Acta* **1990**, *29*, 400-408.
9. Choi, S.; Han, C. D. *Macromolecules* **2004**, *37*, 215-225.
10. Abdel-Goad, M.; Pyckhout-Hintzen, W.; Kahle, S.; Allgaier, J.; Richter, D.; Fetters, L. J. *Macromolecules* **2004**, *37*, 8135-8144.
11. Bates, F. S.; Rosedale, J. H.; Bair, H. E.; Russell, T. P. *Macromolecules* **1989**, *22*, 2557-2564.
12. Roovers, J.; Toporowski, P. M. *Macromolecules* **1992**, *25*, 3454-3461.
13. Bates, F. S.; Bair, H. E.; Hartney, M. A. *Macromolecules* **1984**, *17*, 1987-1993.
14. Bates, F. S. *Macromolecules* **1984**, *17*, 2607-2613.
15. Baurngaertel, M.; De Rosa, M. E.; Machado, J.; Masse, M.; Winter, H. H. *Rheol Acta* **1992**, *31*, 75-82.
16. Rosedale, J. H.; Bates, F. S. *Macromolecules* **1990**, *23*, 2329-2338.
